# Supplementary material for: Microwave-Assisted, One-Pot Synthesis of Doxycycline under Heterogeneous Catalysis in Water
Source: MDPI journal article supplement (doi:10.3390/antibiotics10091084), 2021-09-08
Supplement: s1 [file s1]

## Supplementary Materials

# Microwave-assisted, one-pot synthesis of Doxycycline under heterogeneous catalysis in water

Fabio Bucciol<sup>1</sup>, Elia Maffei<sup>2</sup>, Emanuela Calcio Gaudino<sup>1</sup>, László Jicsinsky<sup>1</sup>, Silvia Tagliapietra<sup>1</sup>, Alessandro Barge<sup>1</sup>, Cristina Prandi<sup>3</sup> and Giancarlo Cravotto<sup>1\*</sup>

<sup>1</sup> Department of Drug Science and Technology, University of Turin, Via P. Giuria 9, 10125 Turin, Italy; fabio.bucciol@unito.it (F.B.); emanuela.calcio@unito.it (E.C.G.); laszlo.jicsinsky@unito.it (L. J.); silvia.tagliapietra@unito.it (S.T.); alessandro.barge@unito.it (A.B.)

<sup>2</sup> Huvepharma Italia Srl, Via Roberto Lepetit, 142, 12075 Garessio (CN) Italy; elia.maffei@unito.it

<sup>3</sup> Department of Chemistry, University of Turin, Via P. Giuria 7, 10125 Turin, Italy; cristina.prandi@unito.it

\* Correspondence: giancarlo.cravotto@unito.it; Tel.: +39-011-6707183

## NMR characterization

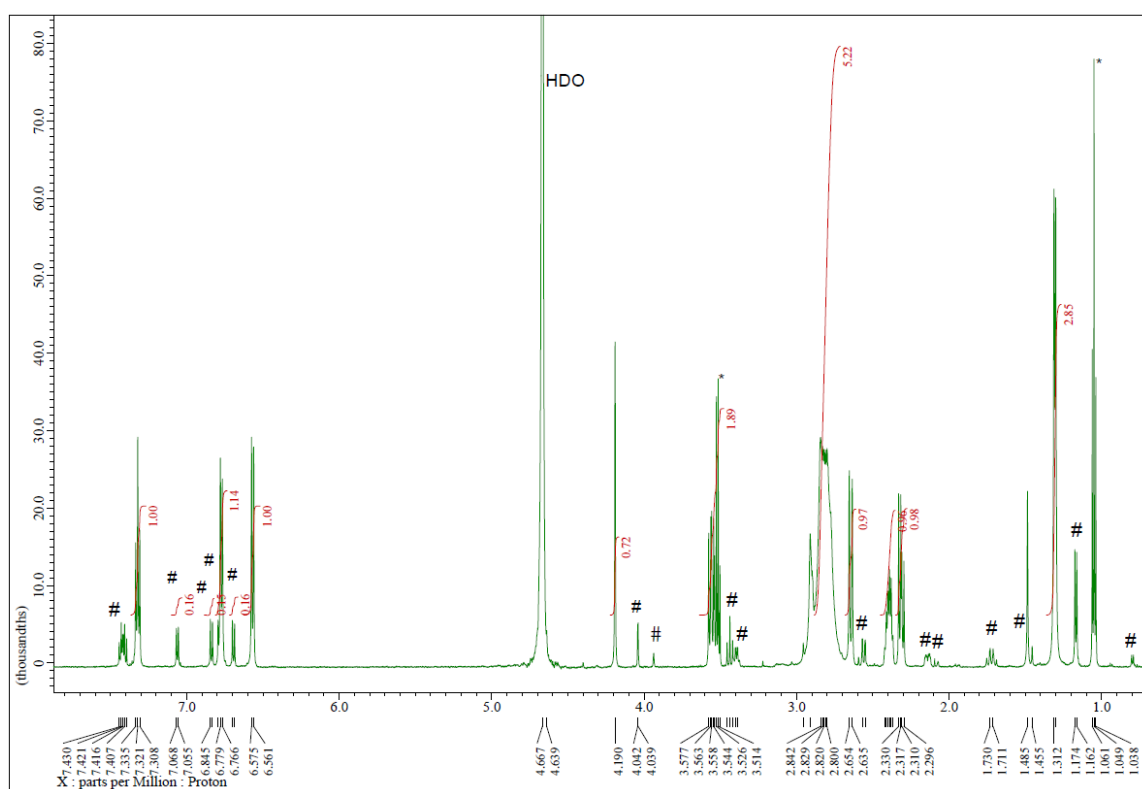

**Figure S1.** <sup>1</sup>H-NMR spectrum of reaction products obtained in presence of  $\beta$ -cyclodextrin. Most abundant signals are attributed to  $\alpha$ -doxycycline, signals labelled with \* are those of methanol, whereas signals identified with # are relative to different isomers ( $\beta$ -doxycycline and, probably, 4-epidoxycycline). 600MHz, D<sub>2</sub>O, RT.



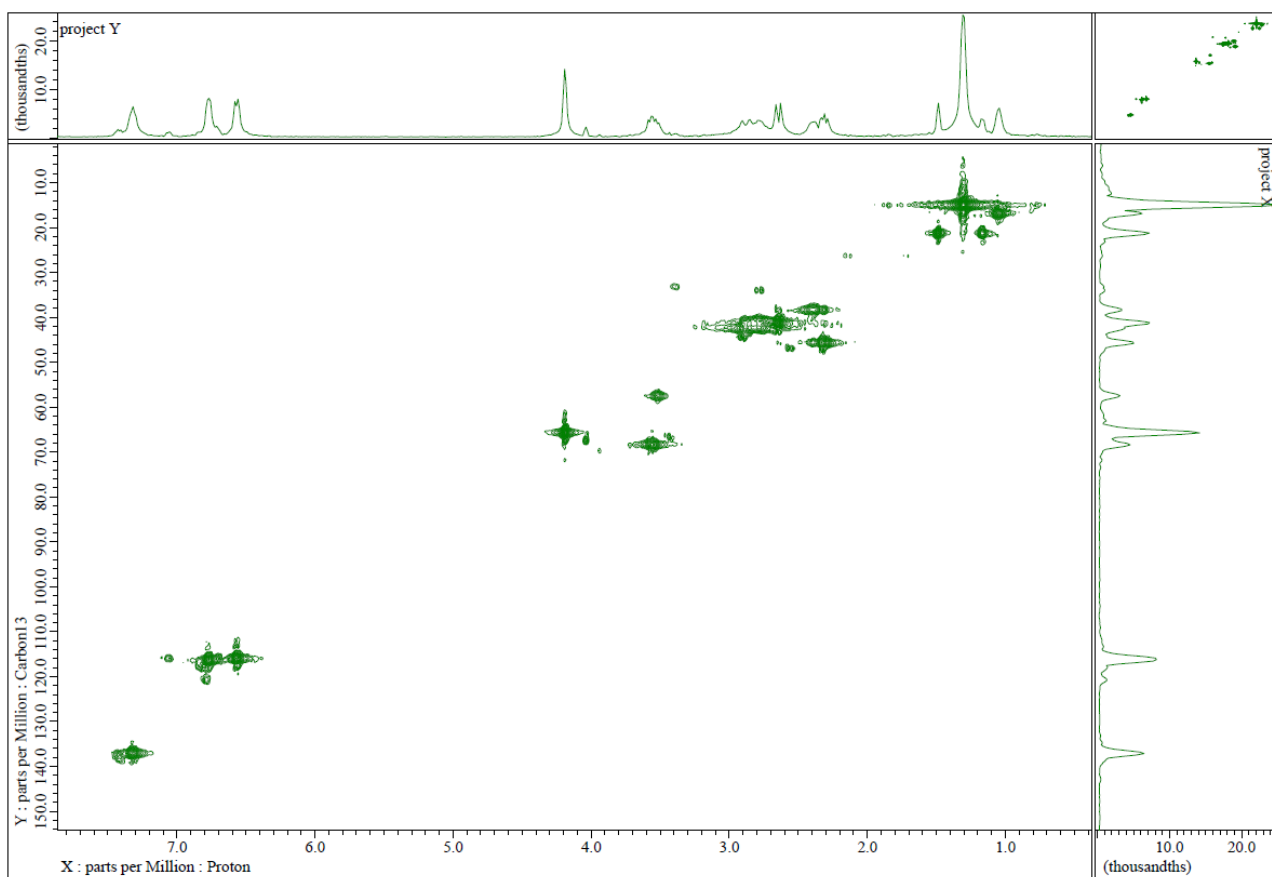

**Figure S4.**  $^1\text{H}$ - $^{13}\text{C}$ -HMQC spectrum of reaction products obtained in presence of  $\beta$ -cyclodextrin.

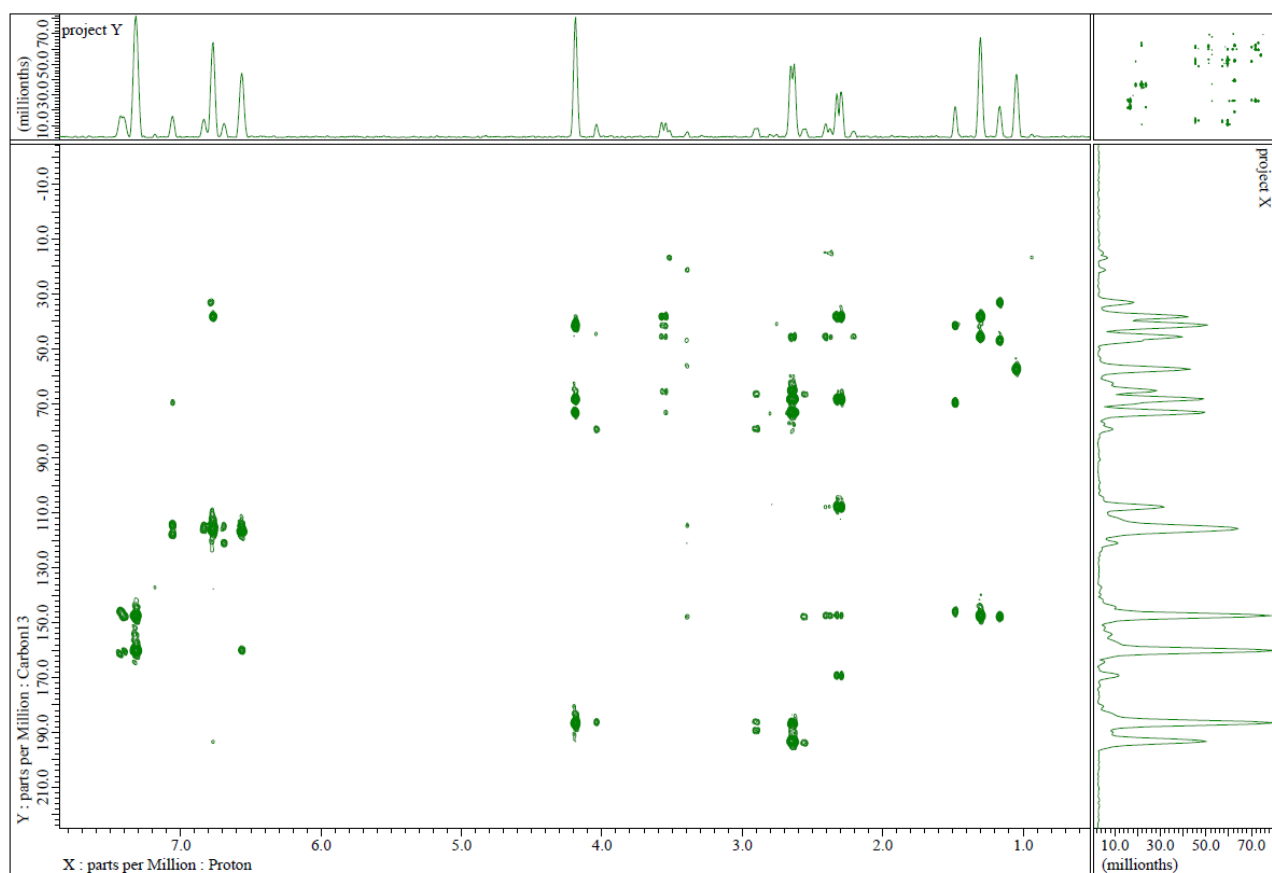

**Figure S5.**  $^1\text{H}$ - $^{13}\text{C}$ -HMBC spectrum of reaction products obtained in presence of  $\beta$ -cyclodextrin.

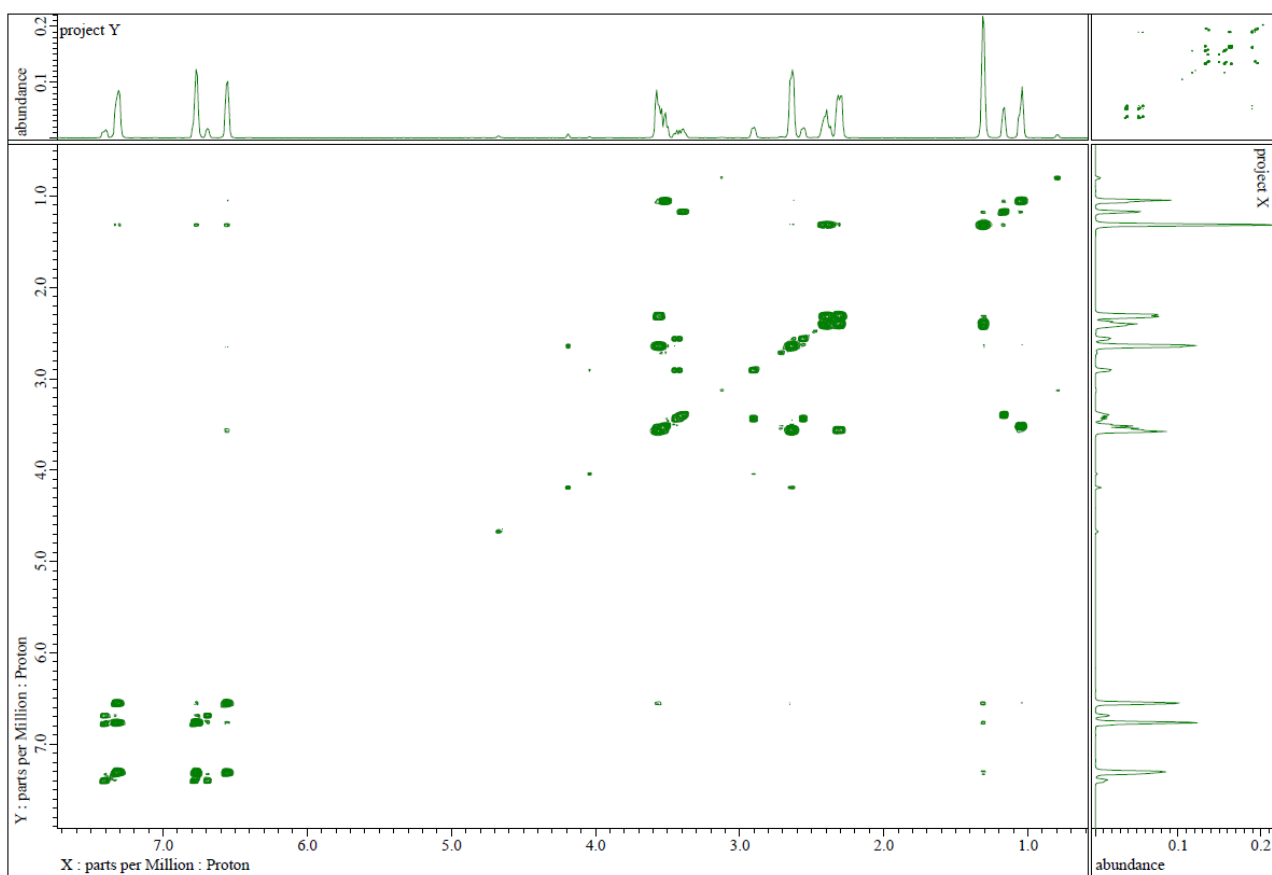

**Figure S6.** DQF-COSY spectrum of  $\alpha$ -doxycycline reference compound.

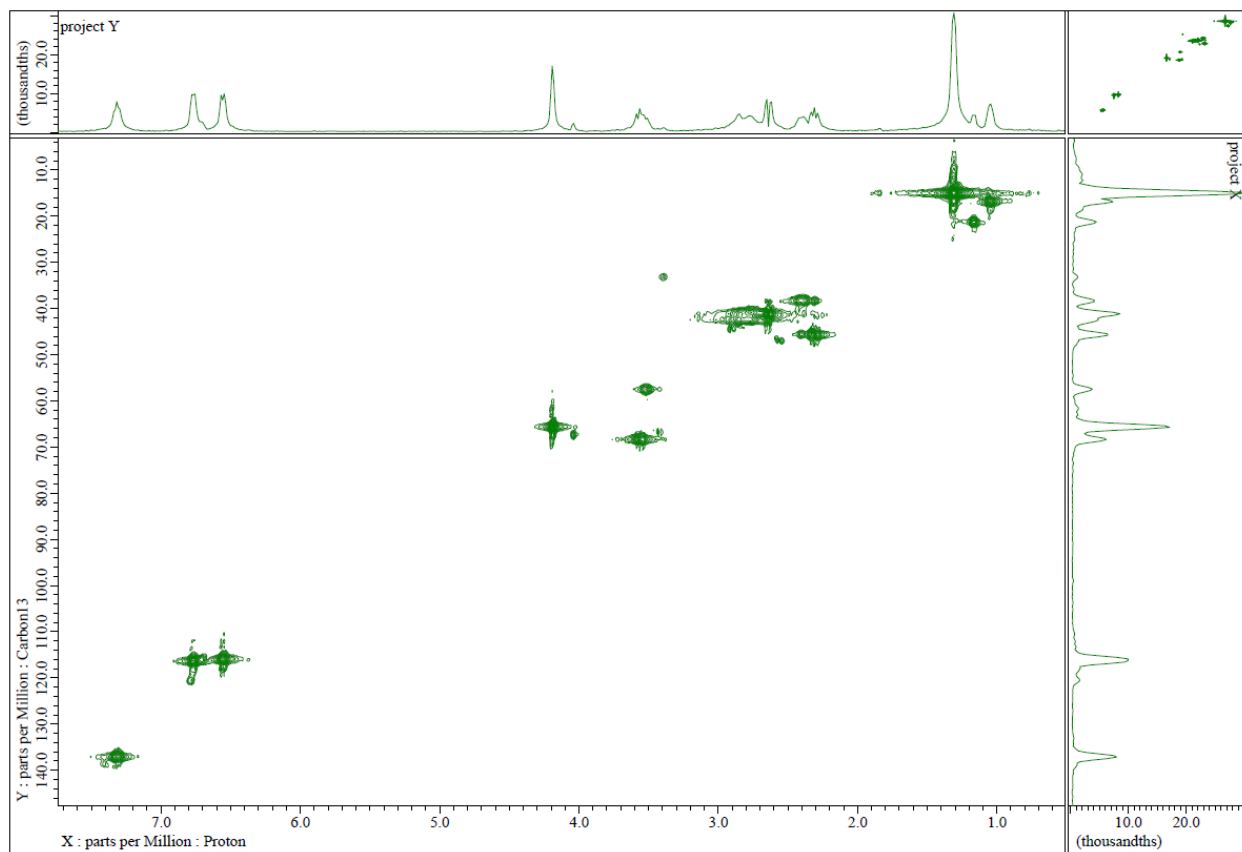

**Figure S7.**  $^1\text{H}$ - $^{13}\text{C}$ -HMQC spectrum of  $\alpha$ -doxycycline reference compound.

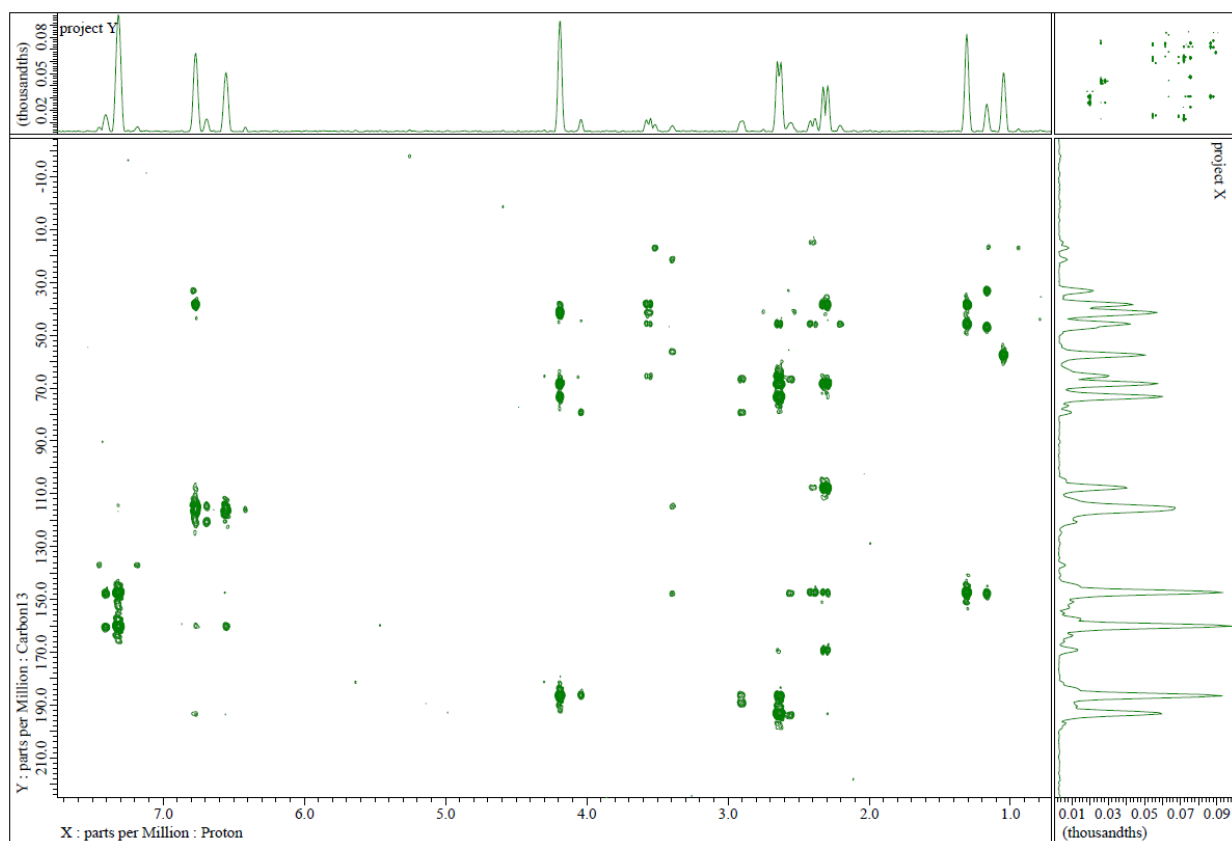

**Figure S8.**  $^1\text{H}$ - $^{13}\text{C}$ -HMBC spectrum of  $\alpha$ -doxycycline reference compound.

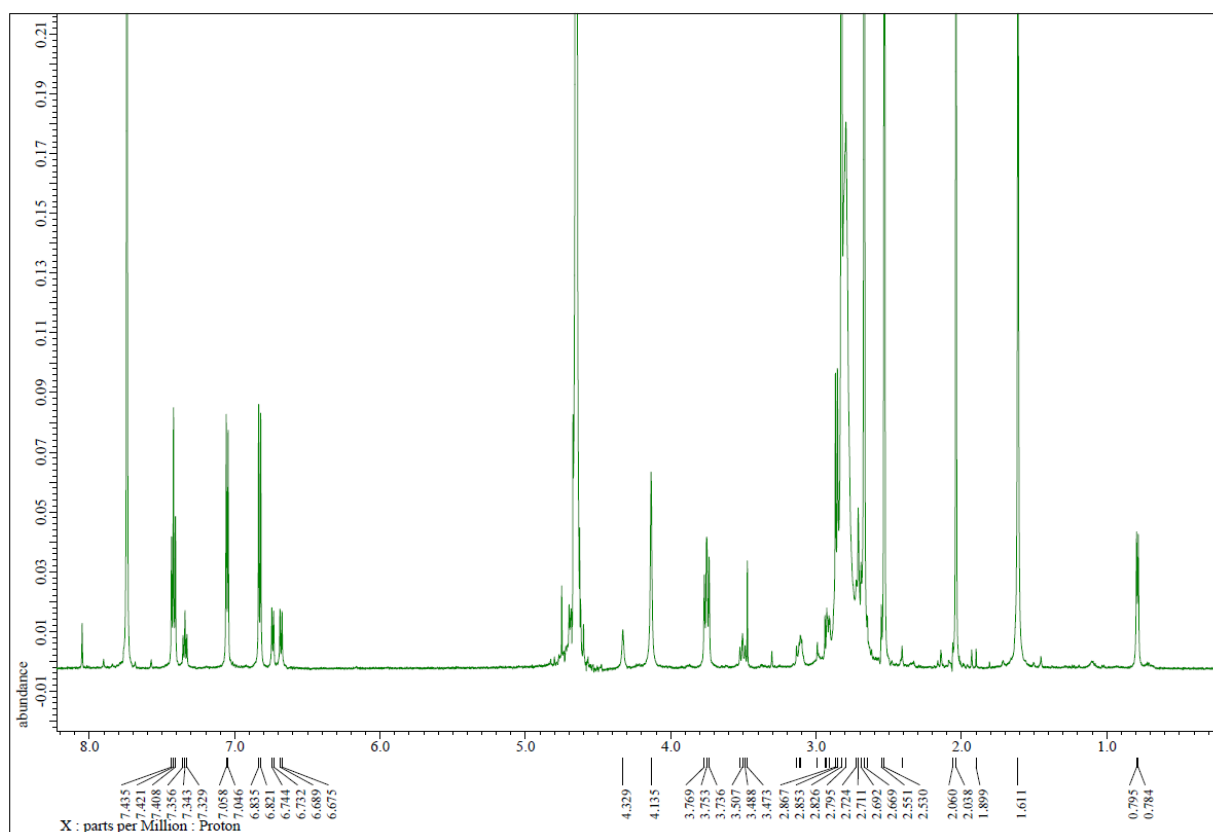

**Figure S9.**  $^1\text{H}$ -NMR spectrum of  $\beta$ -doxycycline (reaction products obtained without  $\beta$ -cyclodextrin).

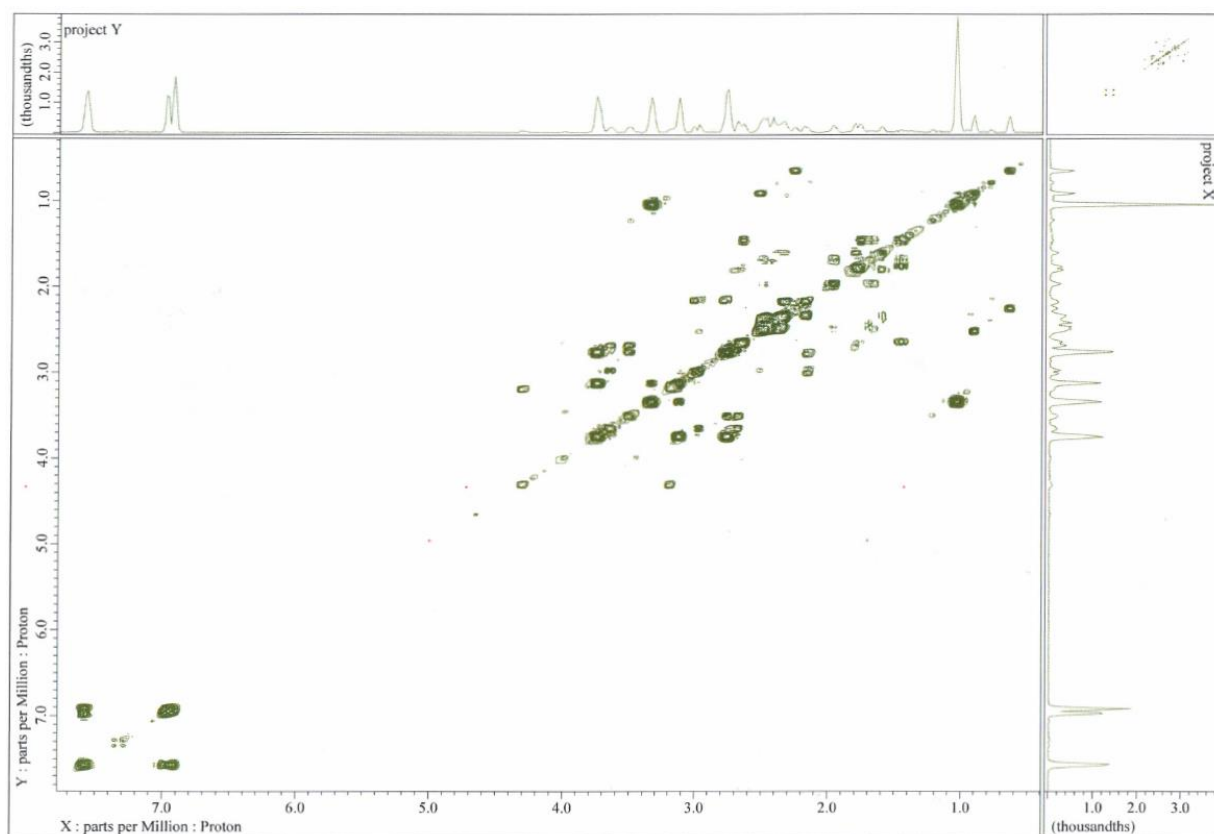

**Figure S10.** COSY spectrum of  $\beta$ -doxycycline (reaction products obtained without  $\beta$ -cyclodextrin).

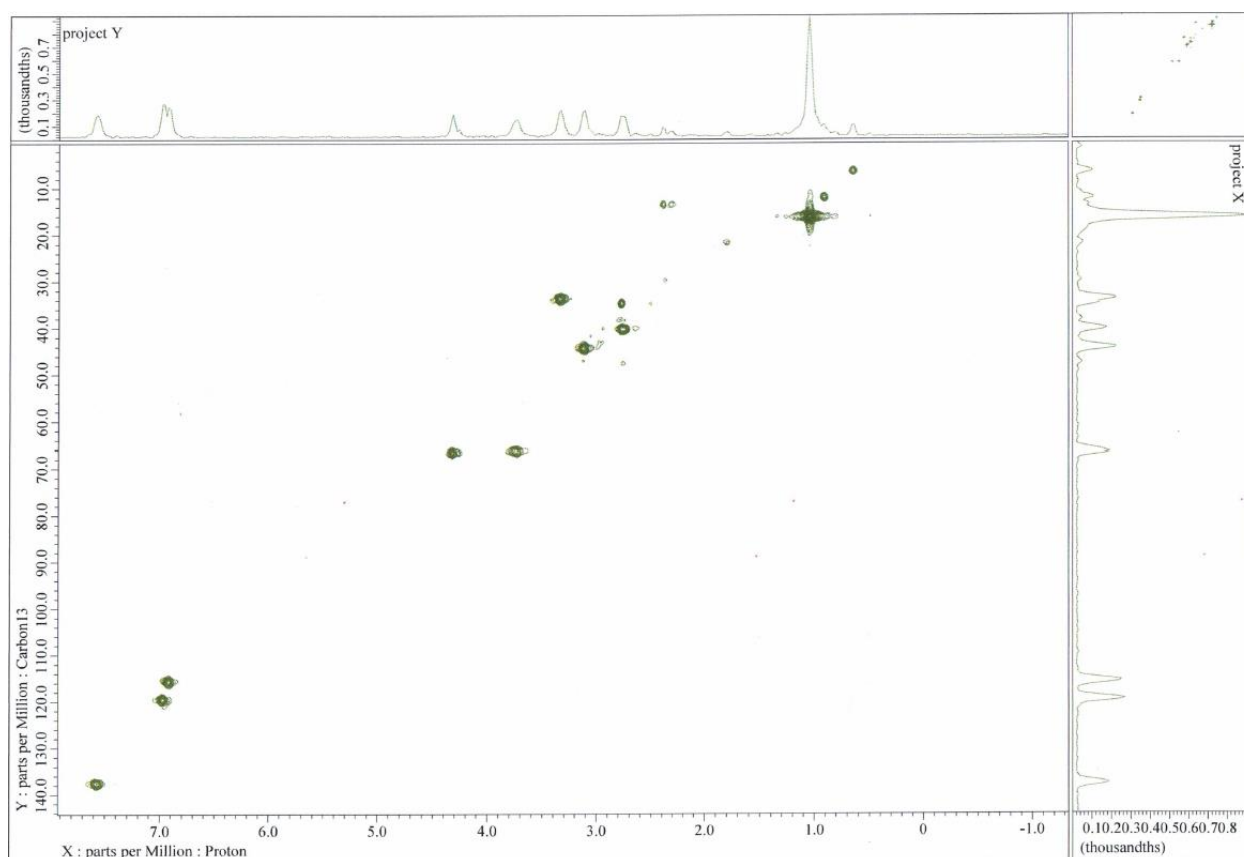

**Figure S11.** <sup>1</sup>H-<sup>13</sup>C HMQC spectrum of  $\beta$ -doxycycline (reaction products obtained without  $\beta$ -cyclodextrin).

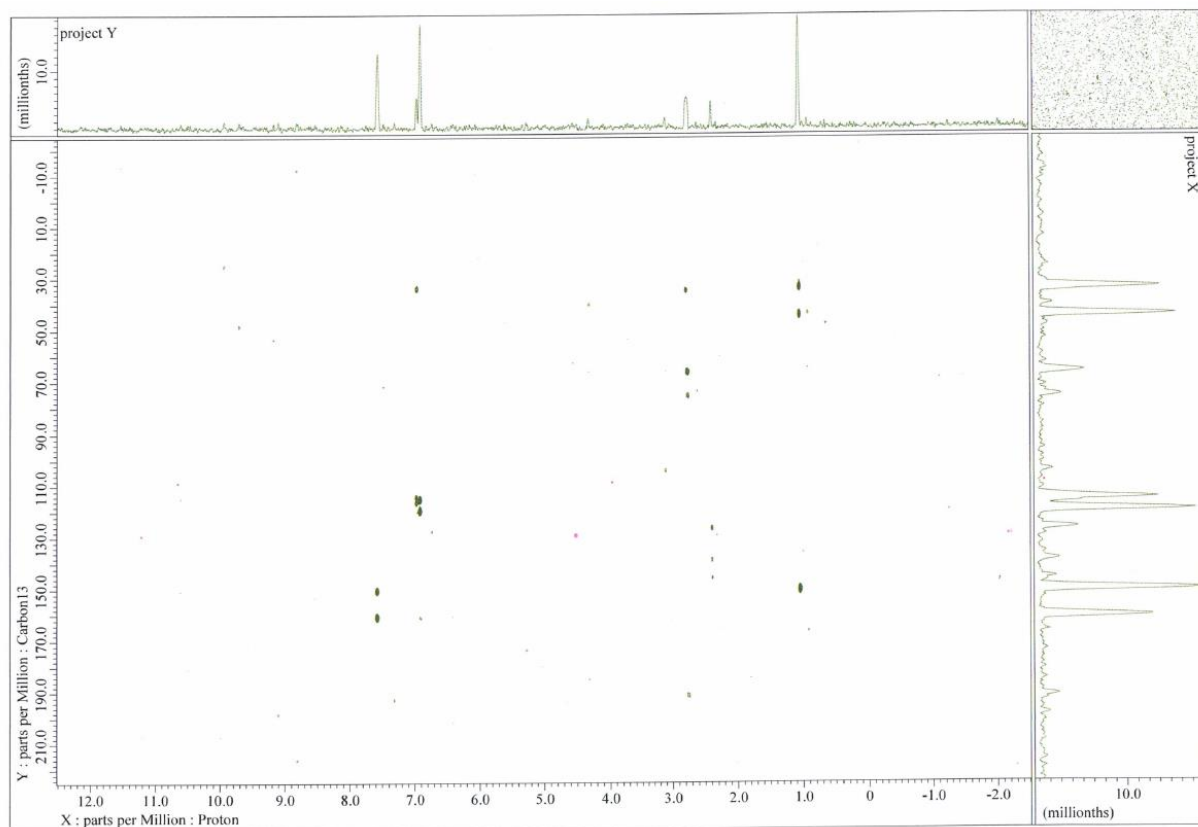

**Figure S12.** <sup>1</sup>H-<sup>13</sup>C HMBC spectrum of β-doxycycline (reaction products obtained without β-cyclodextrin).

## HPLC-MS analysis

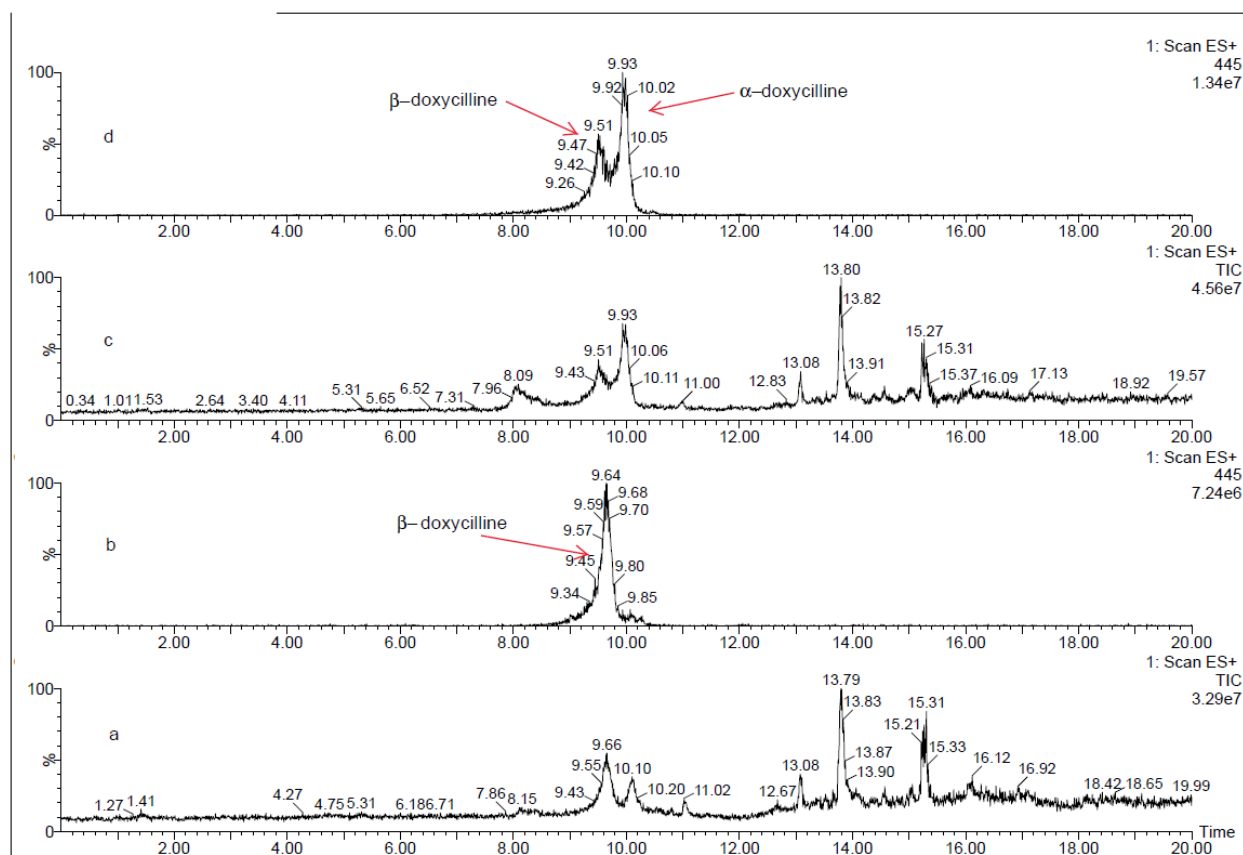

**Figure S13.** Example of HPLC-MS trace of a reaction product obtained without CD addition (trace "a" total ion current, trace "b" extraction of ion with  $m/z = 445$ ), before and after (trace "c" total ion current, trace "d" extraction of ion with  $m/z = 445$ ) the addition of  $\alpha$ -doxycycline reference compound.



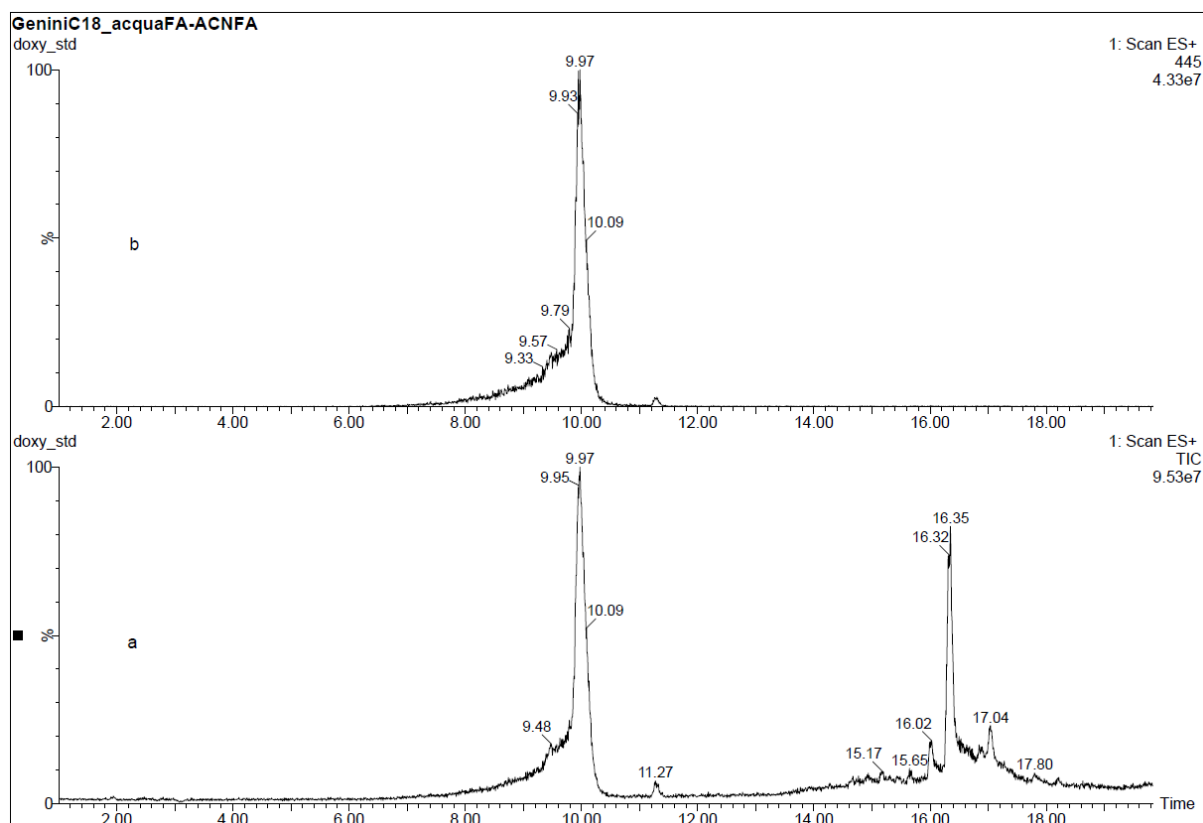

**Figure S14.** HPLC-MS trace of  $\alpha$ -doxycycline reference material (trace “a” total ion current, trace “b” extraction of ion with  $m/z = 445$ ).

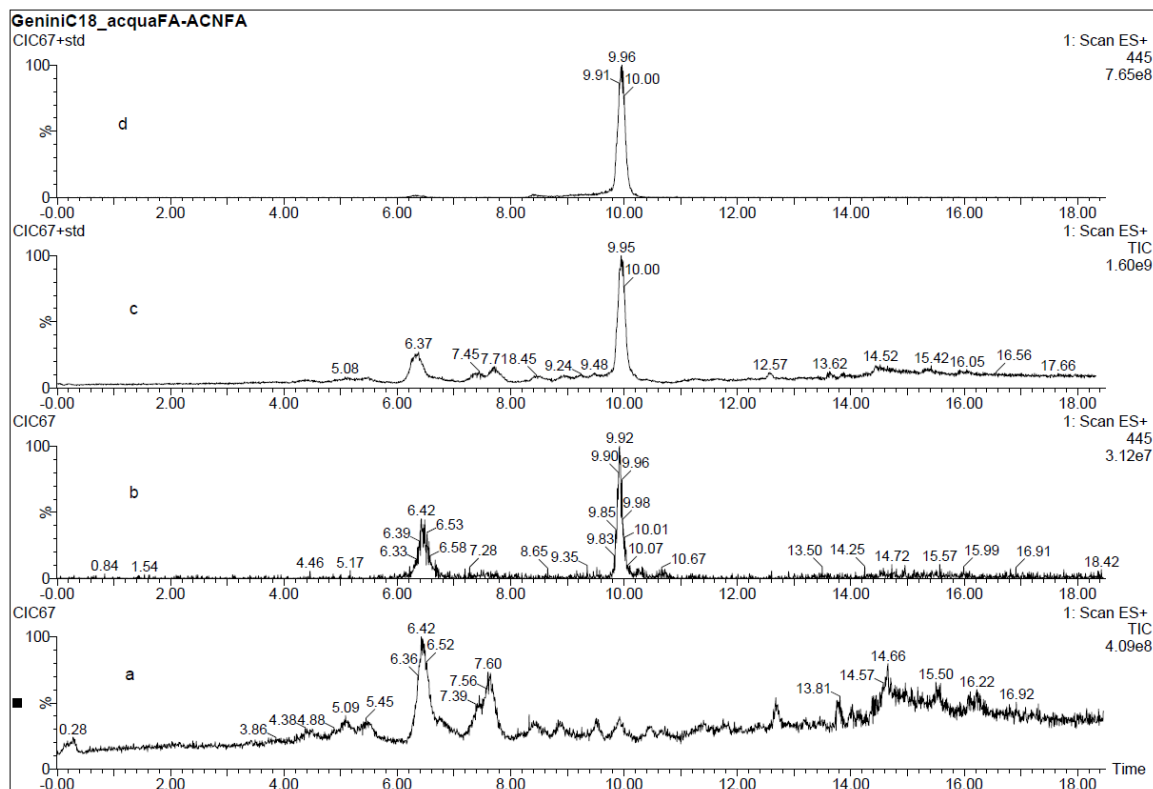

**Figure S15.** Example of HPLC-MS trace of reaction product obtained in presence of cyclodextrin (trace “a” total ion current, trace “b” extraction of ion with  $m/z = 445$ ), before and after (trace “c” total ion current, trace “d” extraction of ion with  $m/z = 445$ ) the addition of  $\alpha$ -doxycycline reference compound.
